# Supplementary material for: Management of dyslipidemia after allogeneic hematopoietic stem cell transplantation
Source: PubMed Central journal article supplement (PMC9344644; doi:10.1186/s12944-022-01665-3), 2022-08-02
Supplement: 12944_2022_1665_MOESM2_ESM.pdf [file 12944_2022_1665_MOESM2_ESM.pdf]

This document certifies that the manuscript

## Management of Dyslipidemia after Allogeneic Hematopoietic Stem Cell Transplantation

prepared by the authors

**Yingxue Lu, Xiaojing Ma, Jie Pan, Rongqiang Ma, Yujie Jiang\***

was edited for proper English language, grammar, punctuation, spelling, and overall style by one or more of the highly qualified native English speaking editors at AJE.

This certificate was issued on **March 15, 2022** and may be verified on the [AJE website](#) using the verification code **BCCE-45F3-325F-4AB7-62D7**.

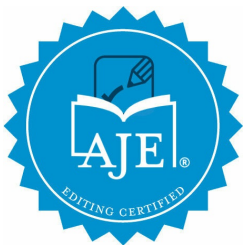

Neither the research content nor the authors' intentions were altered in any way during the editing process. Documents receiving this certification should be English-ready for publication; however, the author has the ability to accept or reject our suggestions and changes. To verify the final AJE edited version, please visit our verification page at [aje.com/certificate](#). If you have any questions or concerns about this edited document, please contact AJE at [support@aje.com](mailto:support@aje.com).
